# Supplementary material
Source: PubMed Central journal article supplement (PMC3242663)
Supplement: mt2011191x1.pdf [file mt2011191x1.pdf]

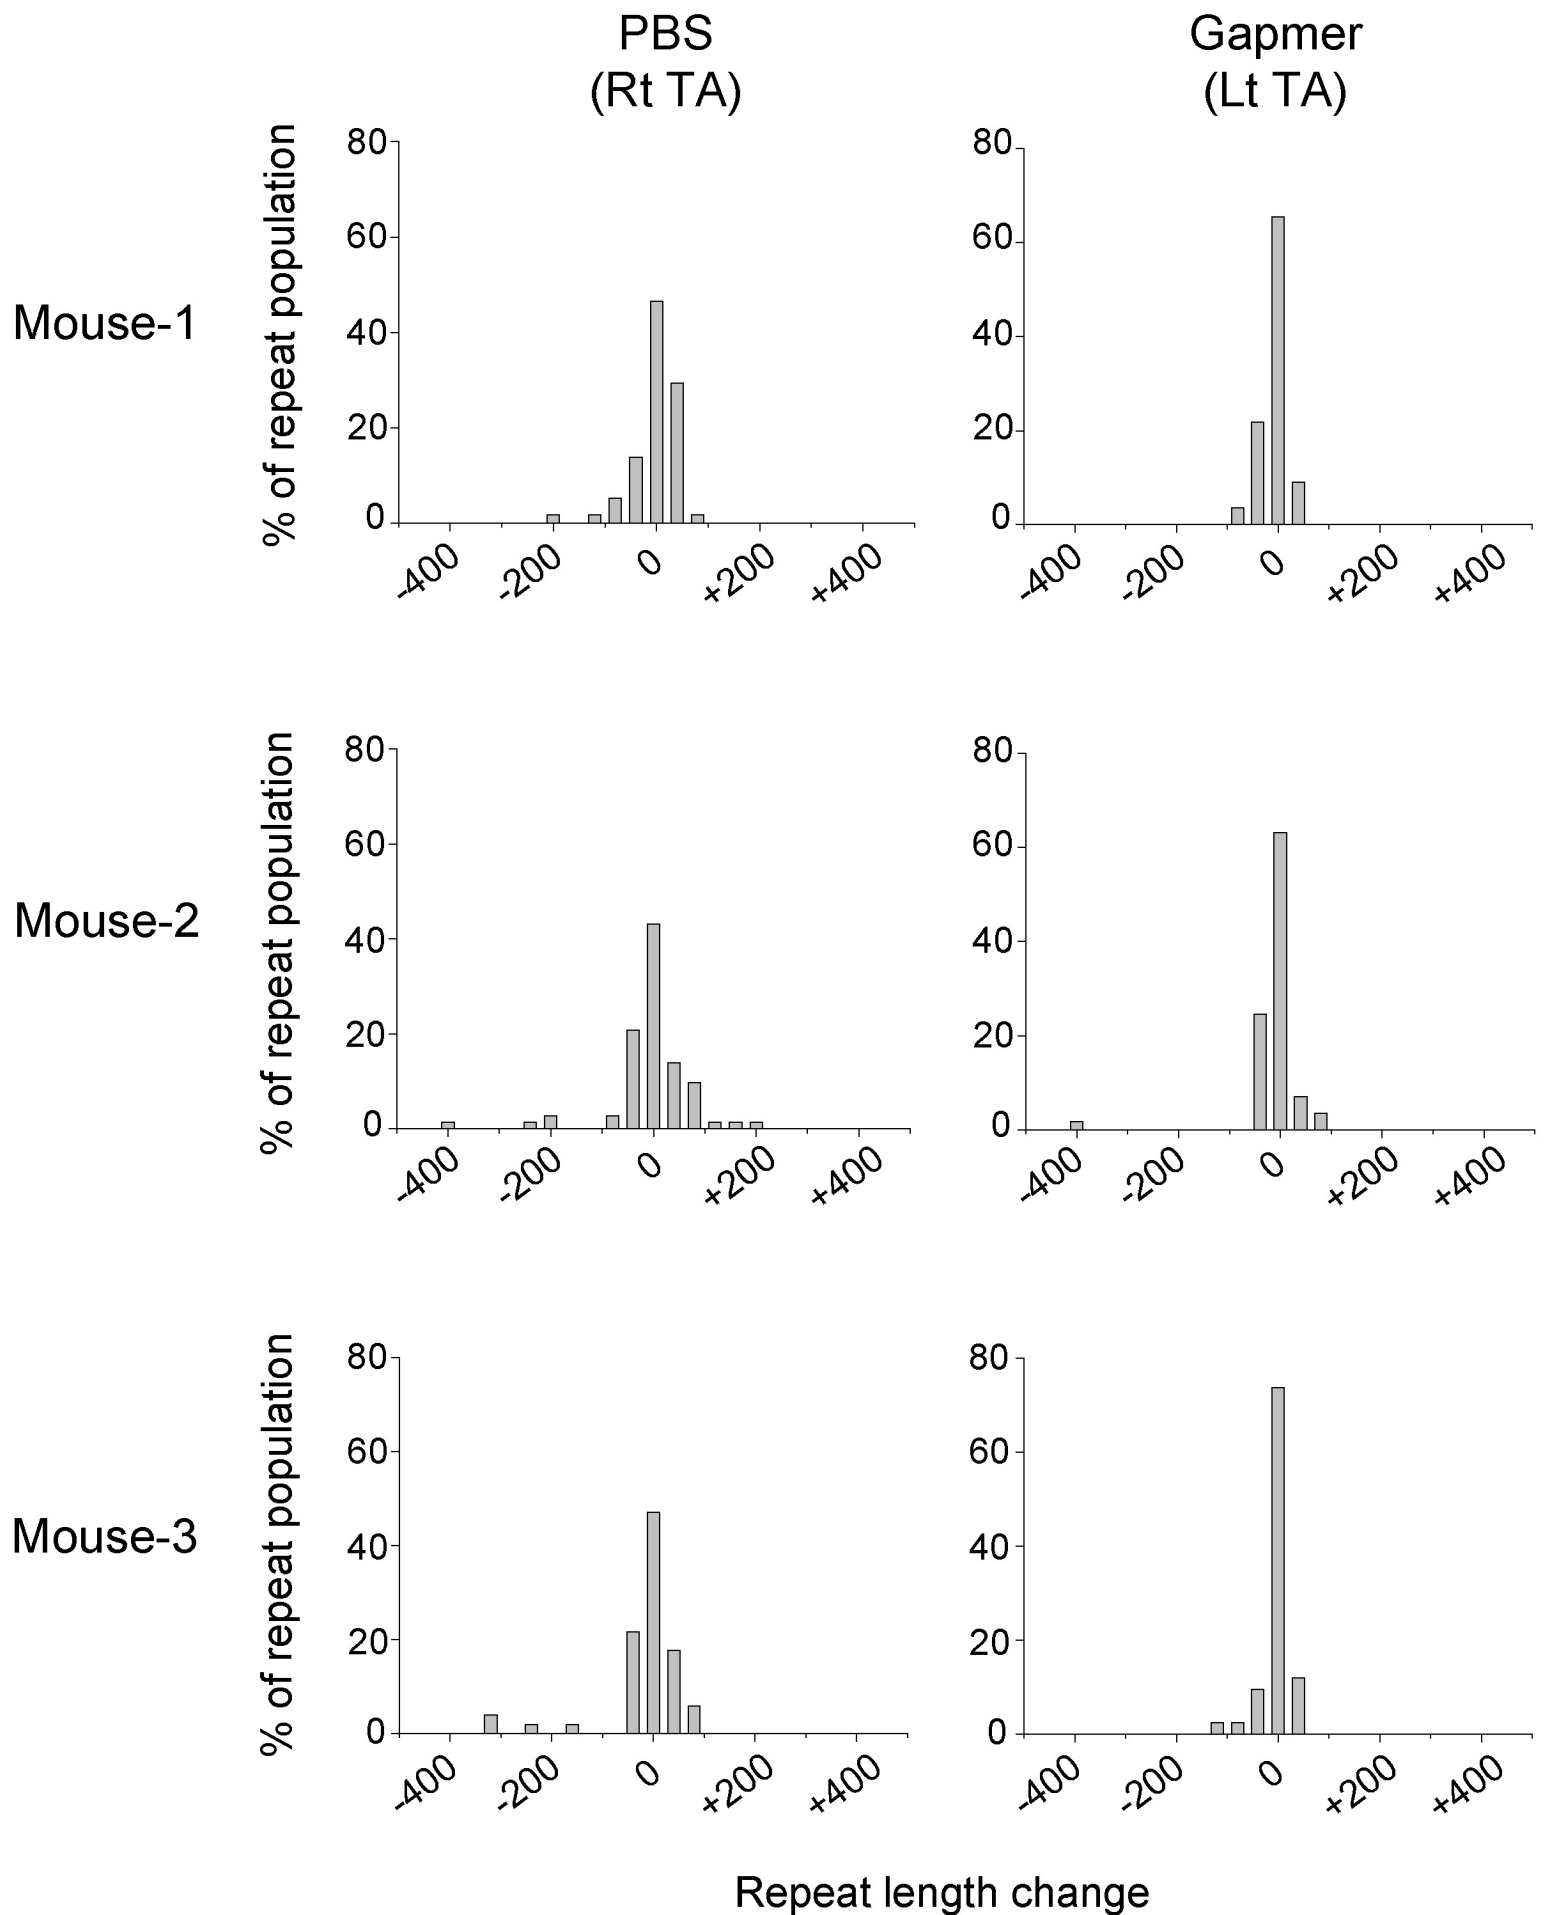

**Supplemental Figure 1:** Histograms of repeat length distributions in mouse muscle treated with the gapmer LNA-ASO or PBS. Allele lengths have been grouped into bins spanning 40 repeats.
