# Supplementary material
Source: PubMed Central journal article supplement (PMC3242663)
Supplement: mt2011191x2.pdf [file mt2011191x2.pdf]

Mouse-4

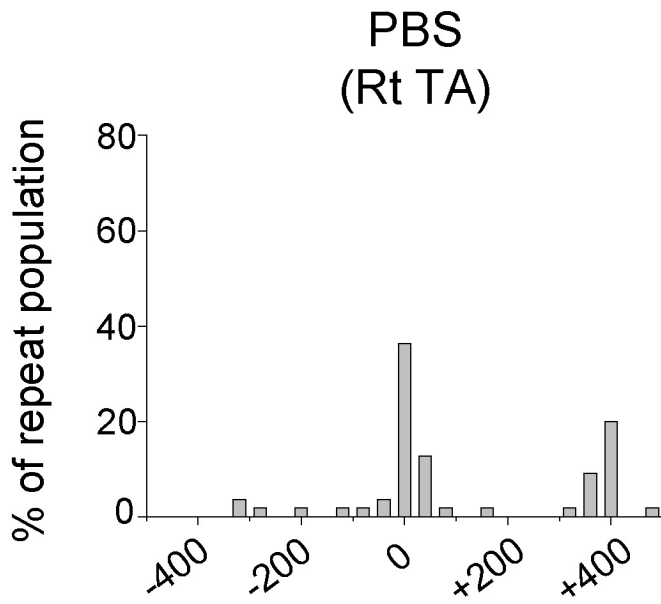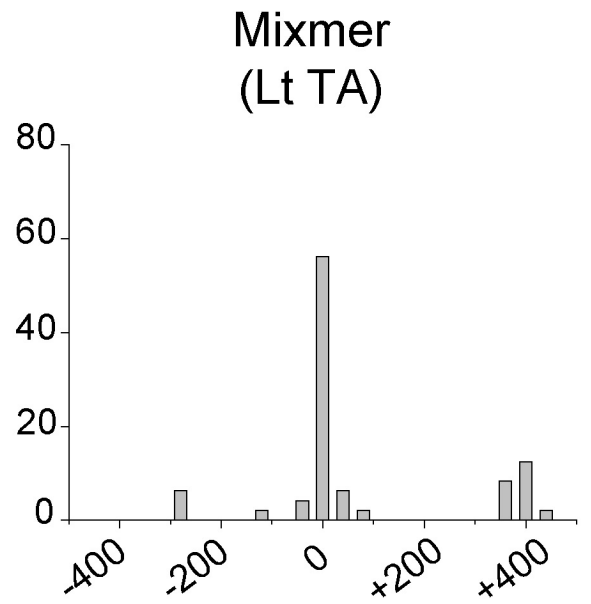

Mouse-5

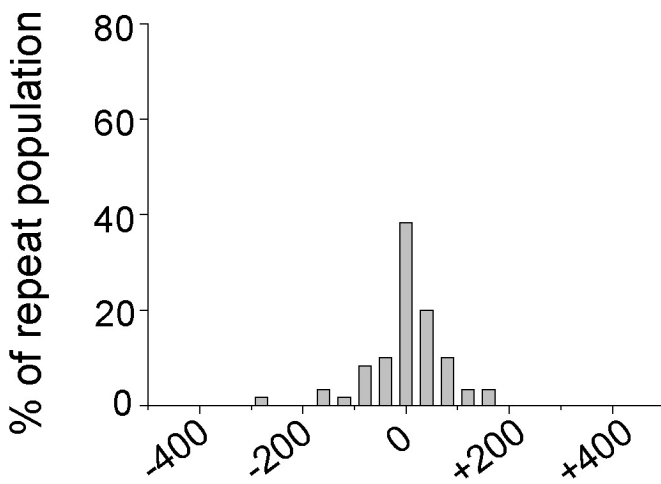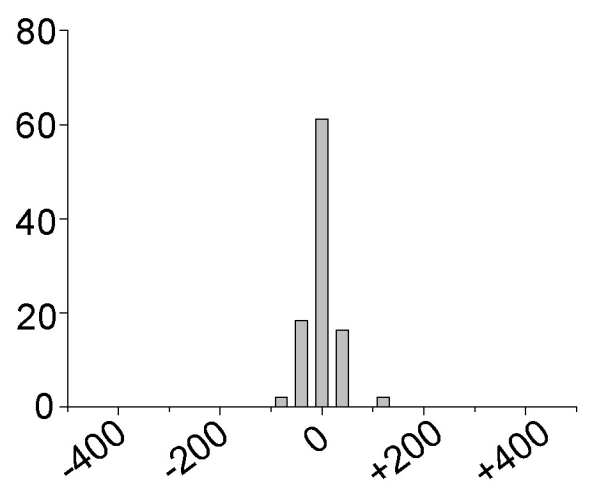

Mouse-6

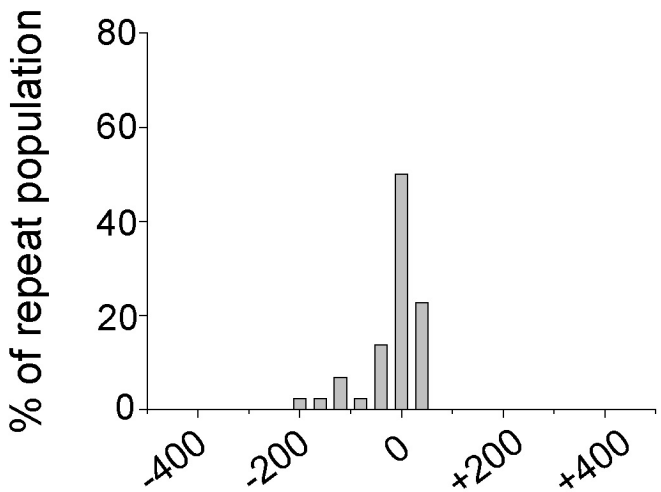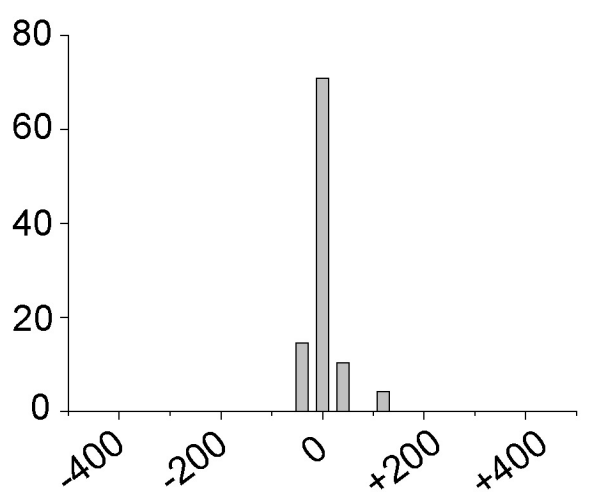

Repeat length change

**Supplemental Figure 2:** Histograms of repeat length distributions in mouse muscle treated with the mixmer LNA-ASO or PBS. Allele lengths have been grouped into bins spanning 40 repeats.
